# Supplementary material for: Enhanced AMPA receptor function promotes cerebellar long-term depression rather than potentiation
Source: PubMed Central journal article supplement — Learn Mem. 2014 Dec;21(12):662–7. doi: 10.1101/lm.035220.114 (PMC4236409; doi:10.1101/lm.035220.114), 2014-12
Supplement: supp_21.12.662_Supplemental_Table_1.pdf [file supp_21.12.662_Supplemental_Table_1.pdf]

|                               |                          | baseline (t=5 min) | CX546 (t=15 min)     |
|-------------------------------|--------------------------|--------------------|----------------------|
| <b>Amplitude EPSC 1 (n=5)</b> | <b>Elec.</b>             | <b>88.23±2.58%</b> | <b>104.70±9.66%</b>  |
|                               | <b>[Ca<sup>2+</sup>]</b> | <b>95.53±7.89%</b> | <b>152.03±26.99%</b> |
| <b>Amplitude EPSC 2 (n=4)</b> | <b>Elec.</b>             | <b>92.38±2.25%</b> | <b>113.73±8.75%</b>  |
|                               | <b>[Ca<sup>2+</sup>]</b> | <b>84.50±3.53%</b> | <b>164.55±37.13%</b> |
| <b>Charge EPSC 1 (n=5)</b>    | <b>Elec.</b>             | <b>93.70±3.73%</b> | <b>238.01±22.36%</b> |
|                               | <b>[Ca<sup>2+</sup>]</b> | <b>85.12±9.56%</b> | <b>158.14±27.16%</b> |
| <b>Charge EPSC 2 (n=4)</b>    | <b>Elec.</b>             | <b>94.60±4.97%</b> | <b>303.46±26.39%</b> |
|                               | <b>[Ca<sup>2+</sup>]</b> | <b>83.60±2.38%</b> | <b>192.31±45.41%</b> |
