# Supplementary figures and images for: Enhanced AMPA receptor function promotes cerebellar long-term depression rather than potentiation
Source: PubMed Central journal article supplement — Learn Mem. 2014 Dec;21(12):662–7. doi: 10.1101/lm.035220.114 (PMC4236409; doi:10.1101/lm.035220.114), 2014-12

**A**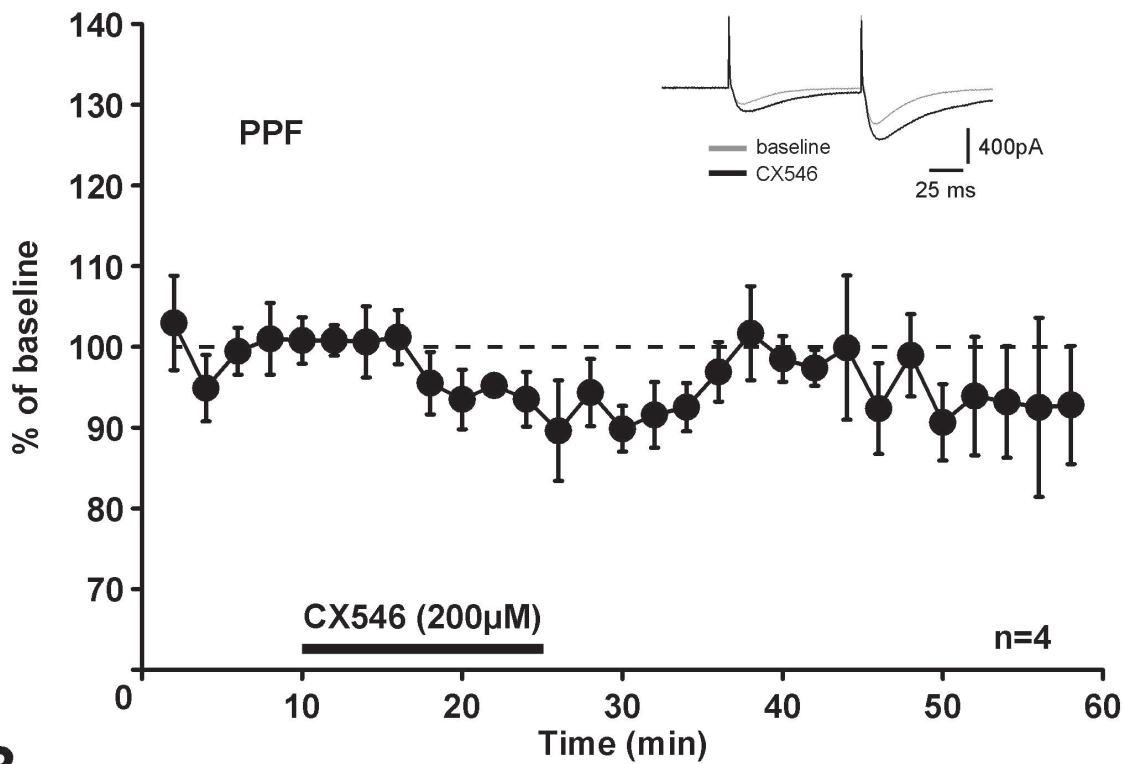**B**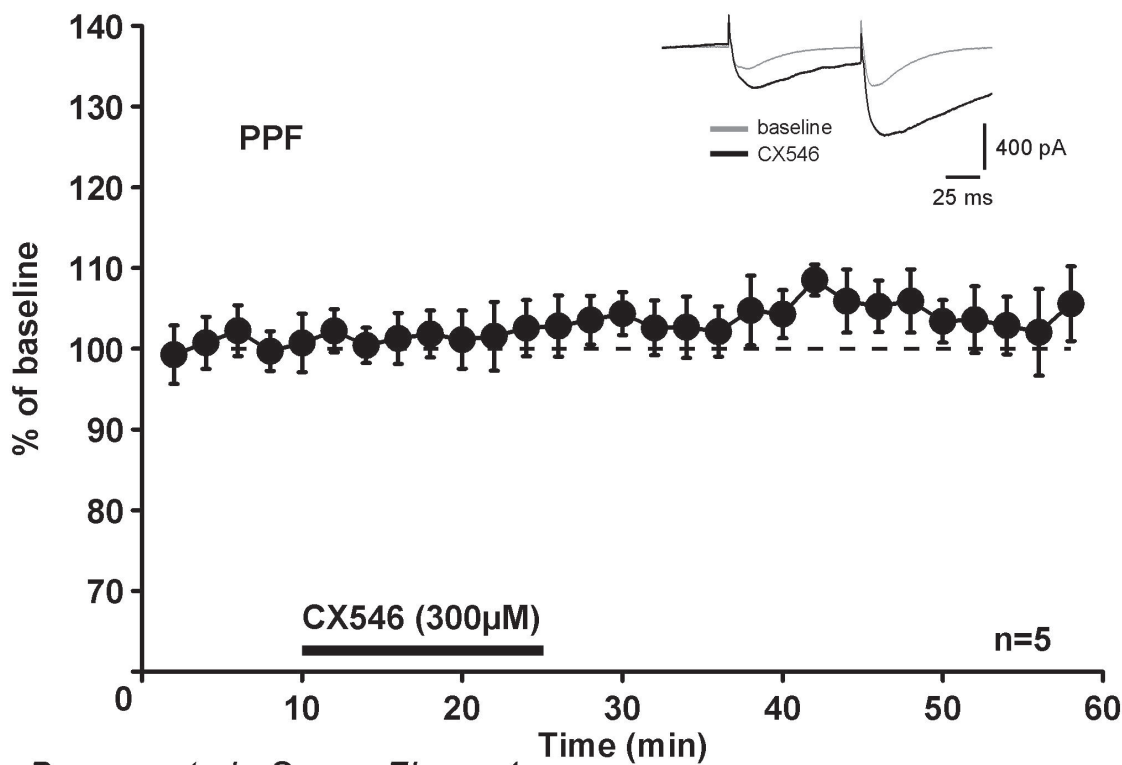

Supplement: supp_21.12.662_Supplemental_Figure_1.pdf [file supp_21.12.662_Supplemental_Figure_1.pdf]

**A**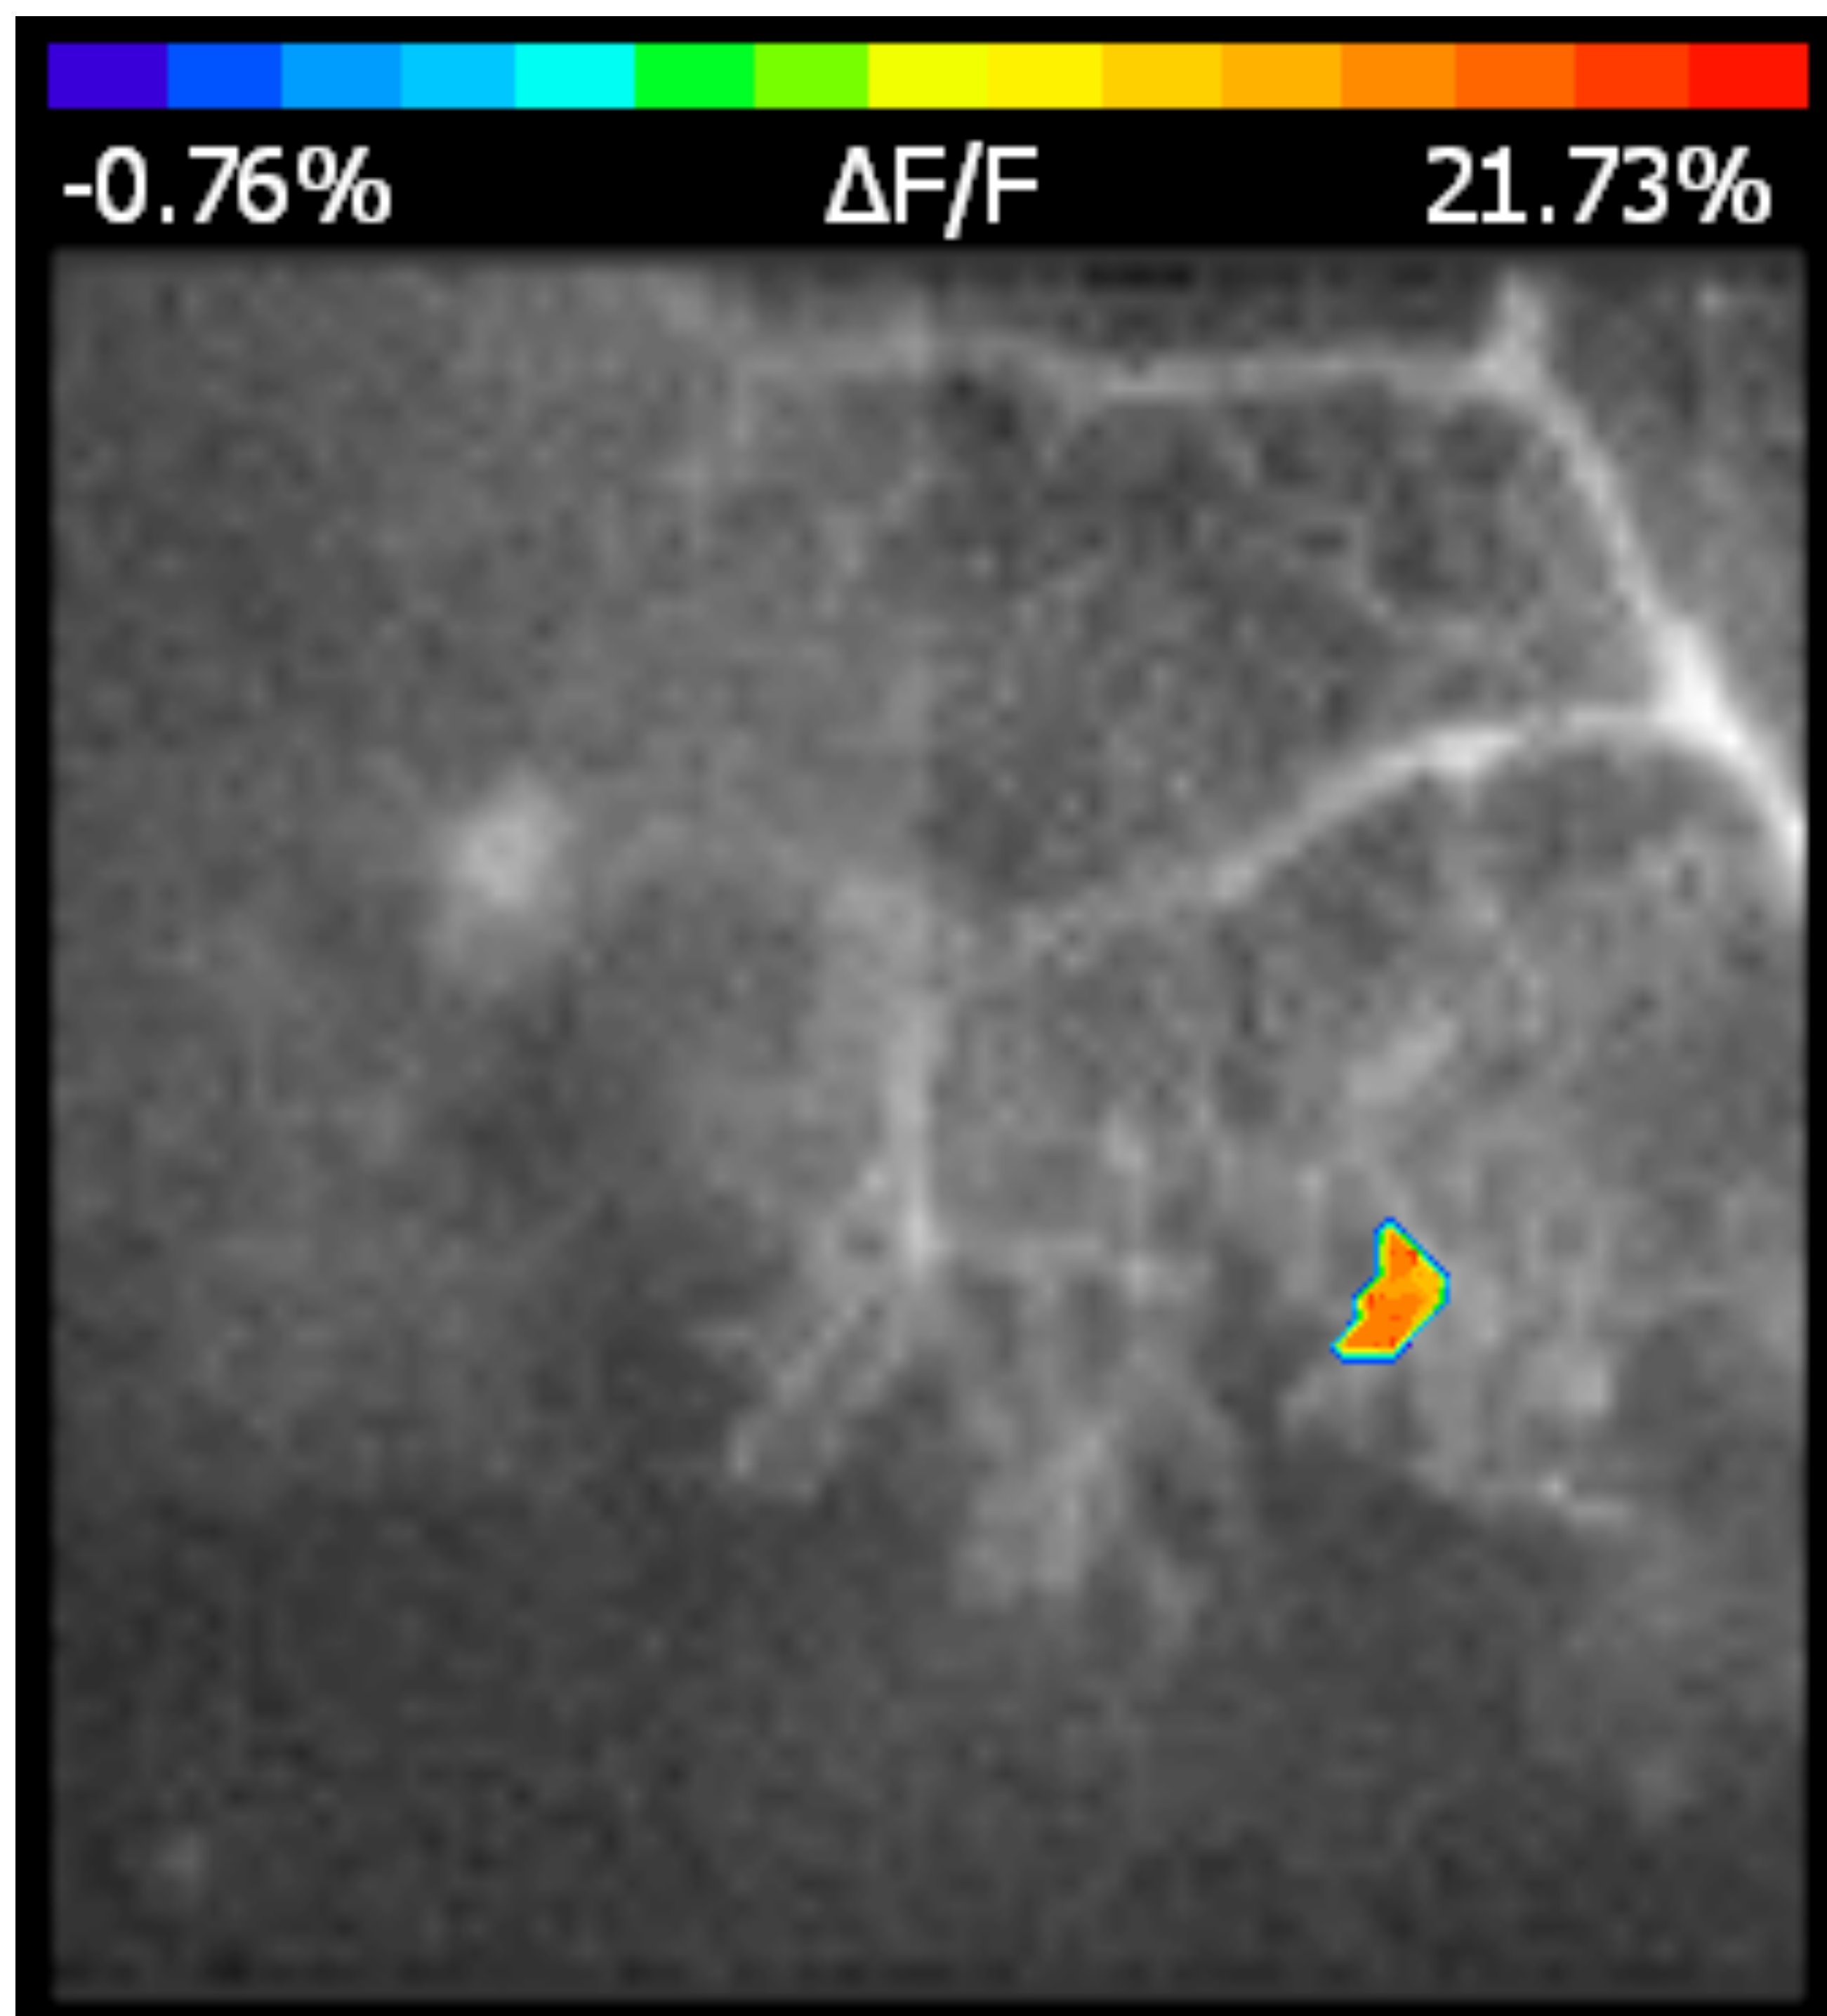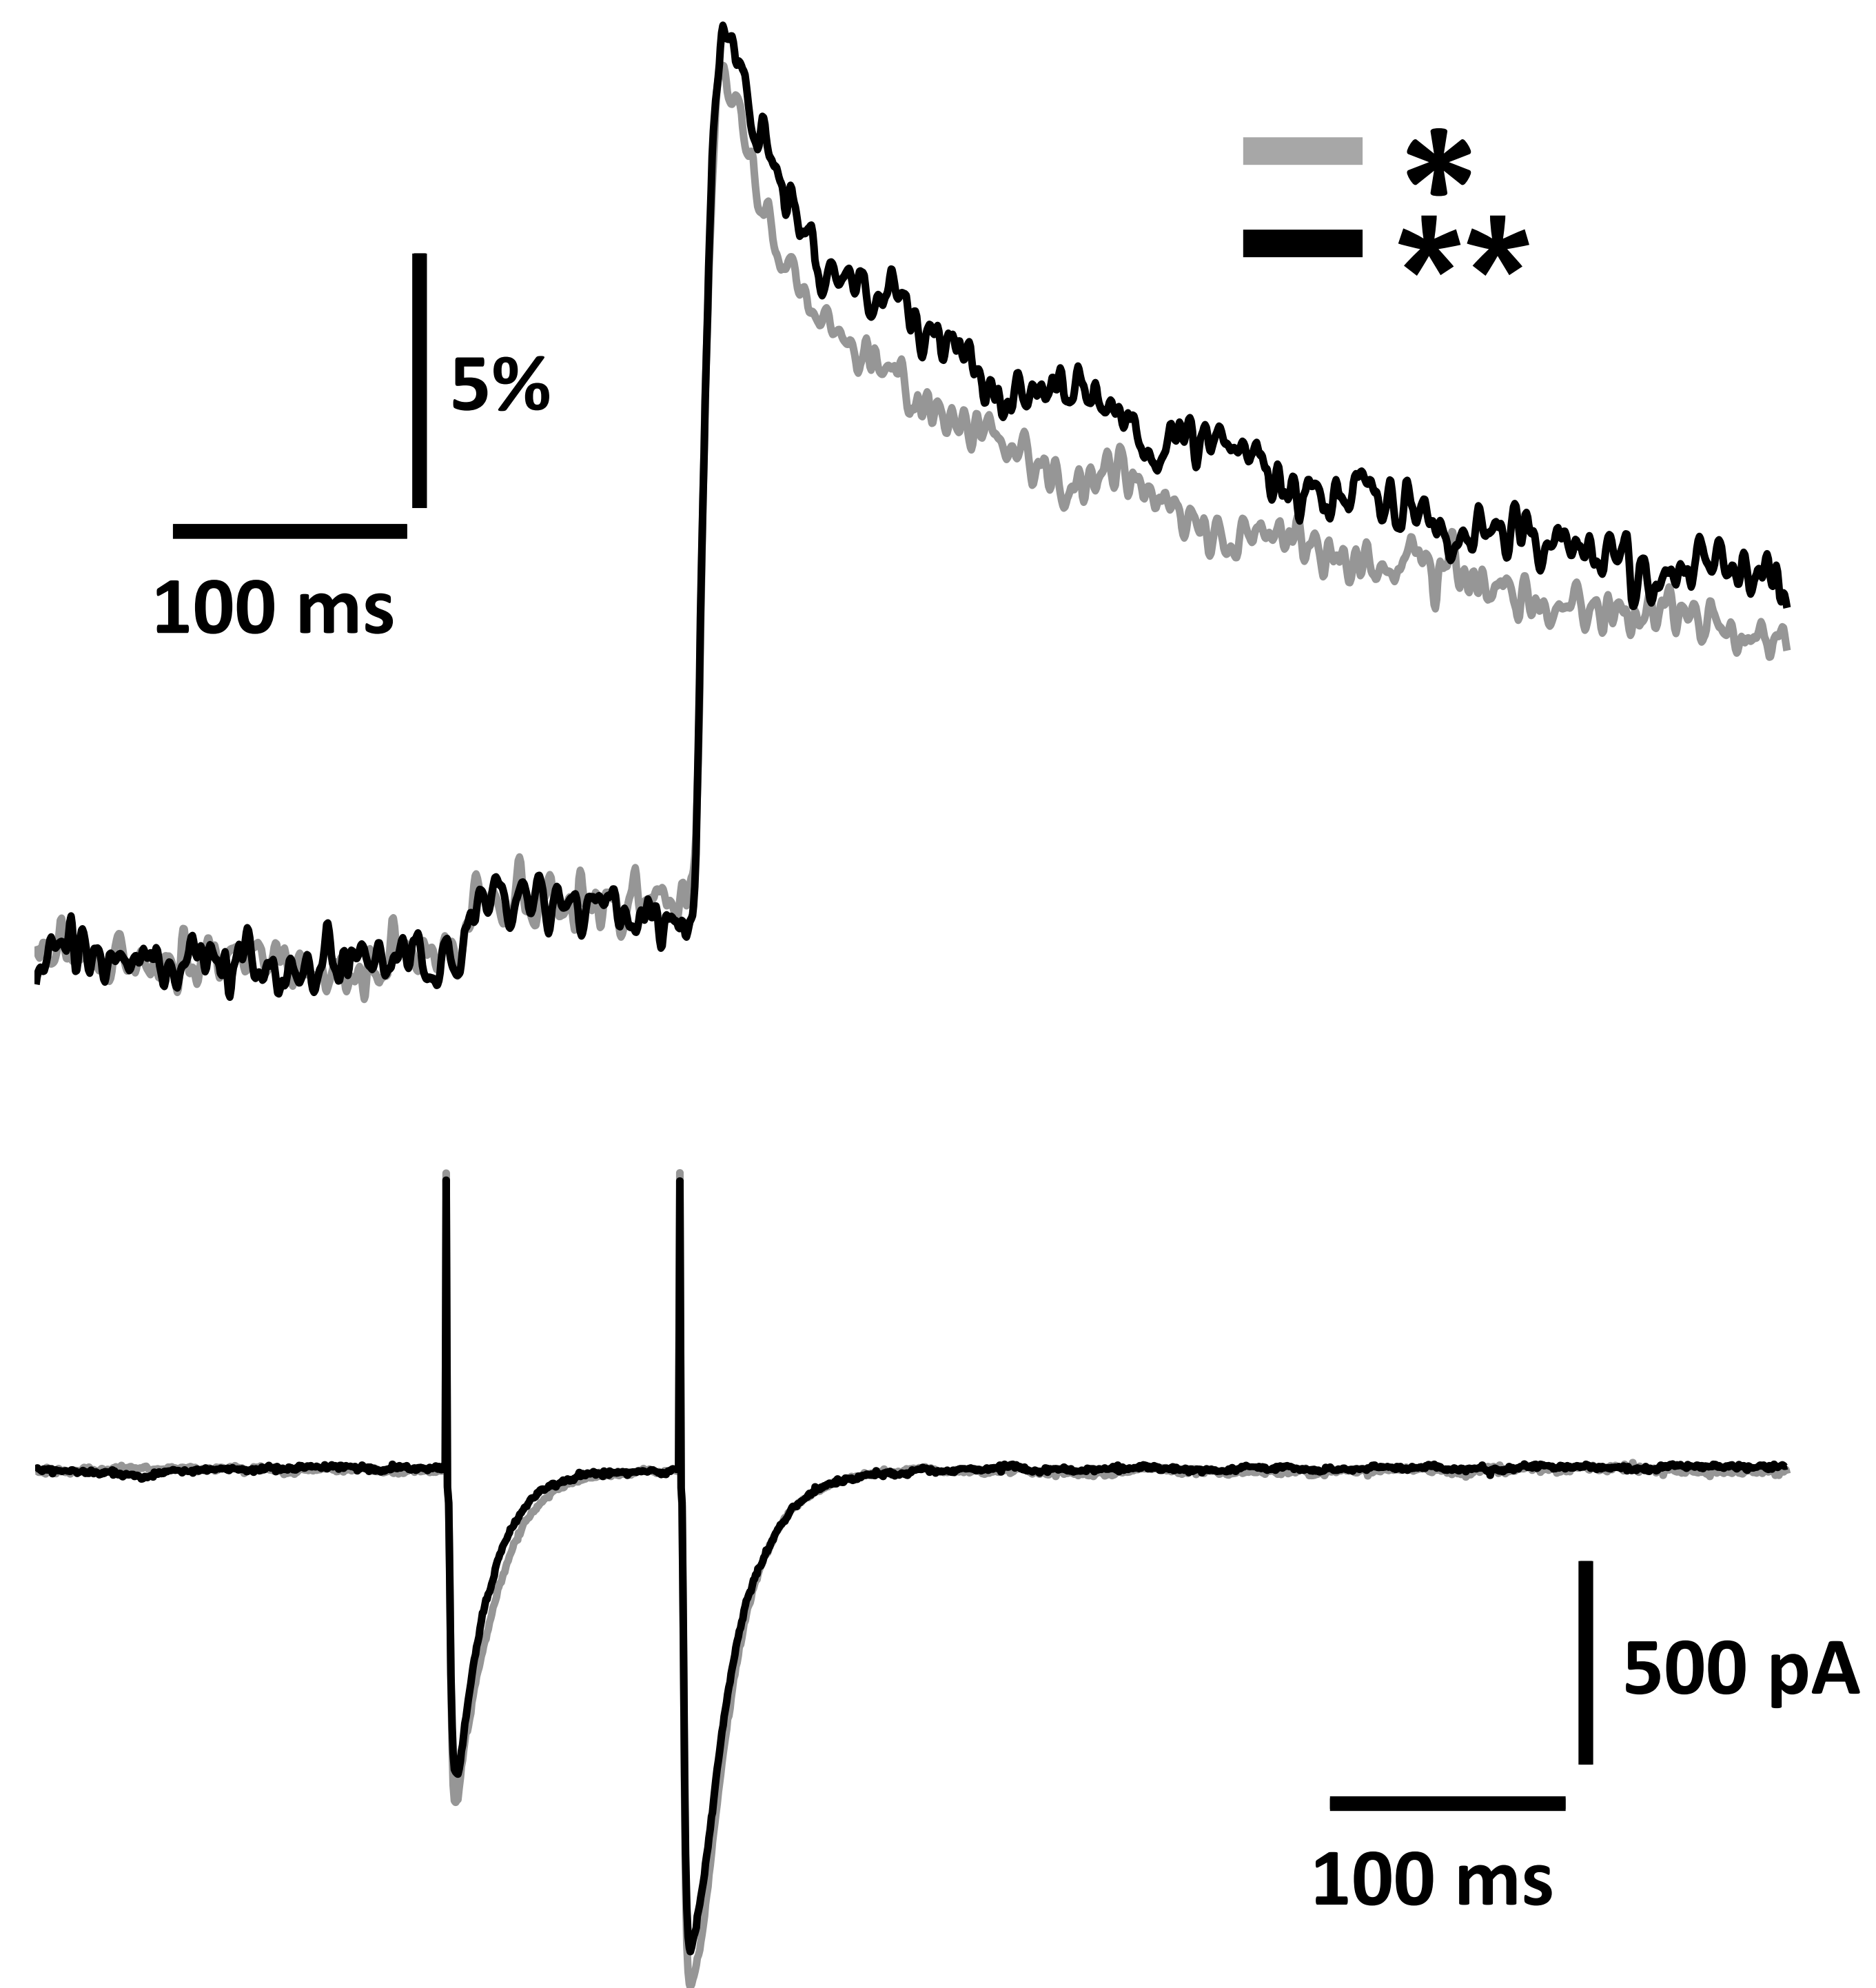**B**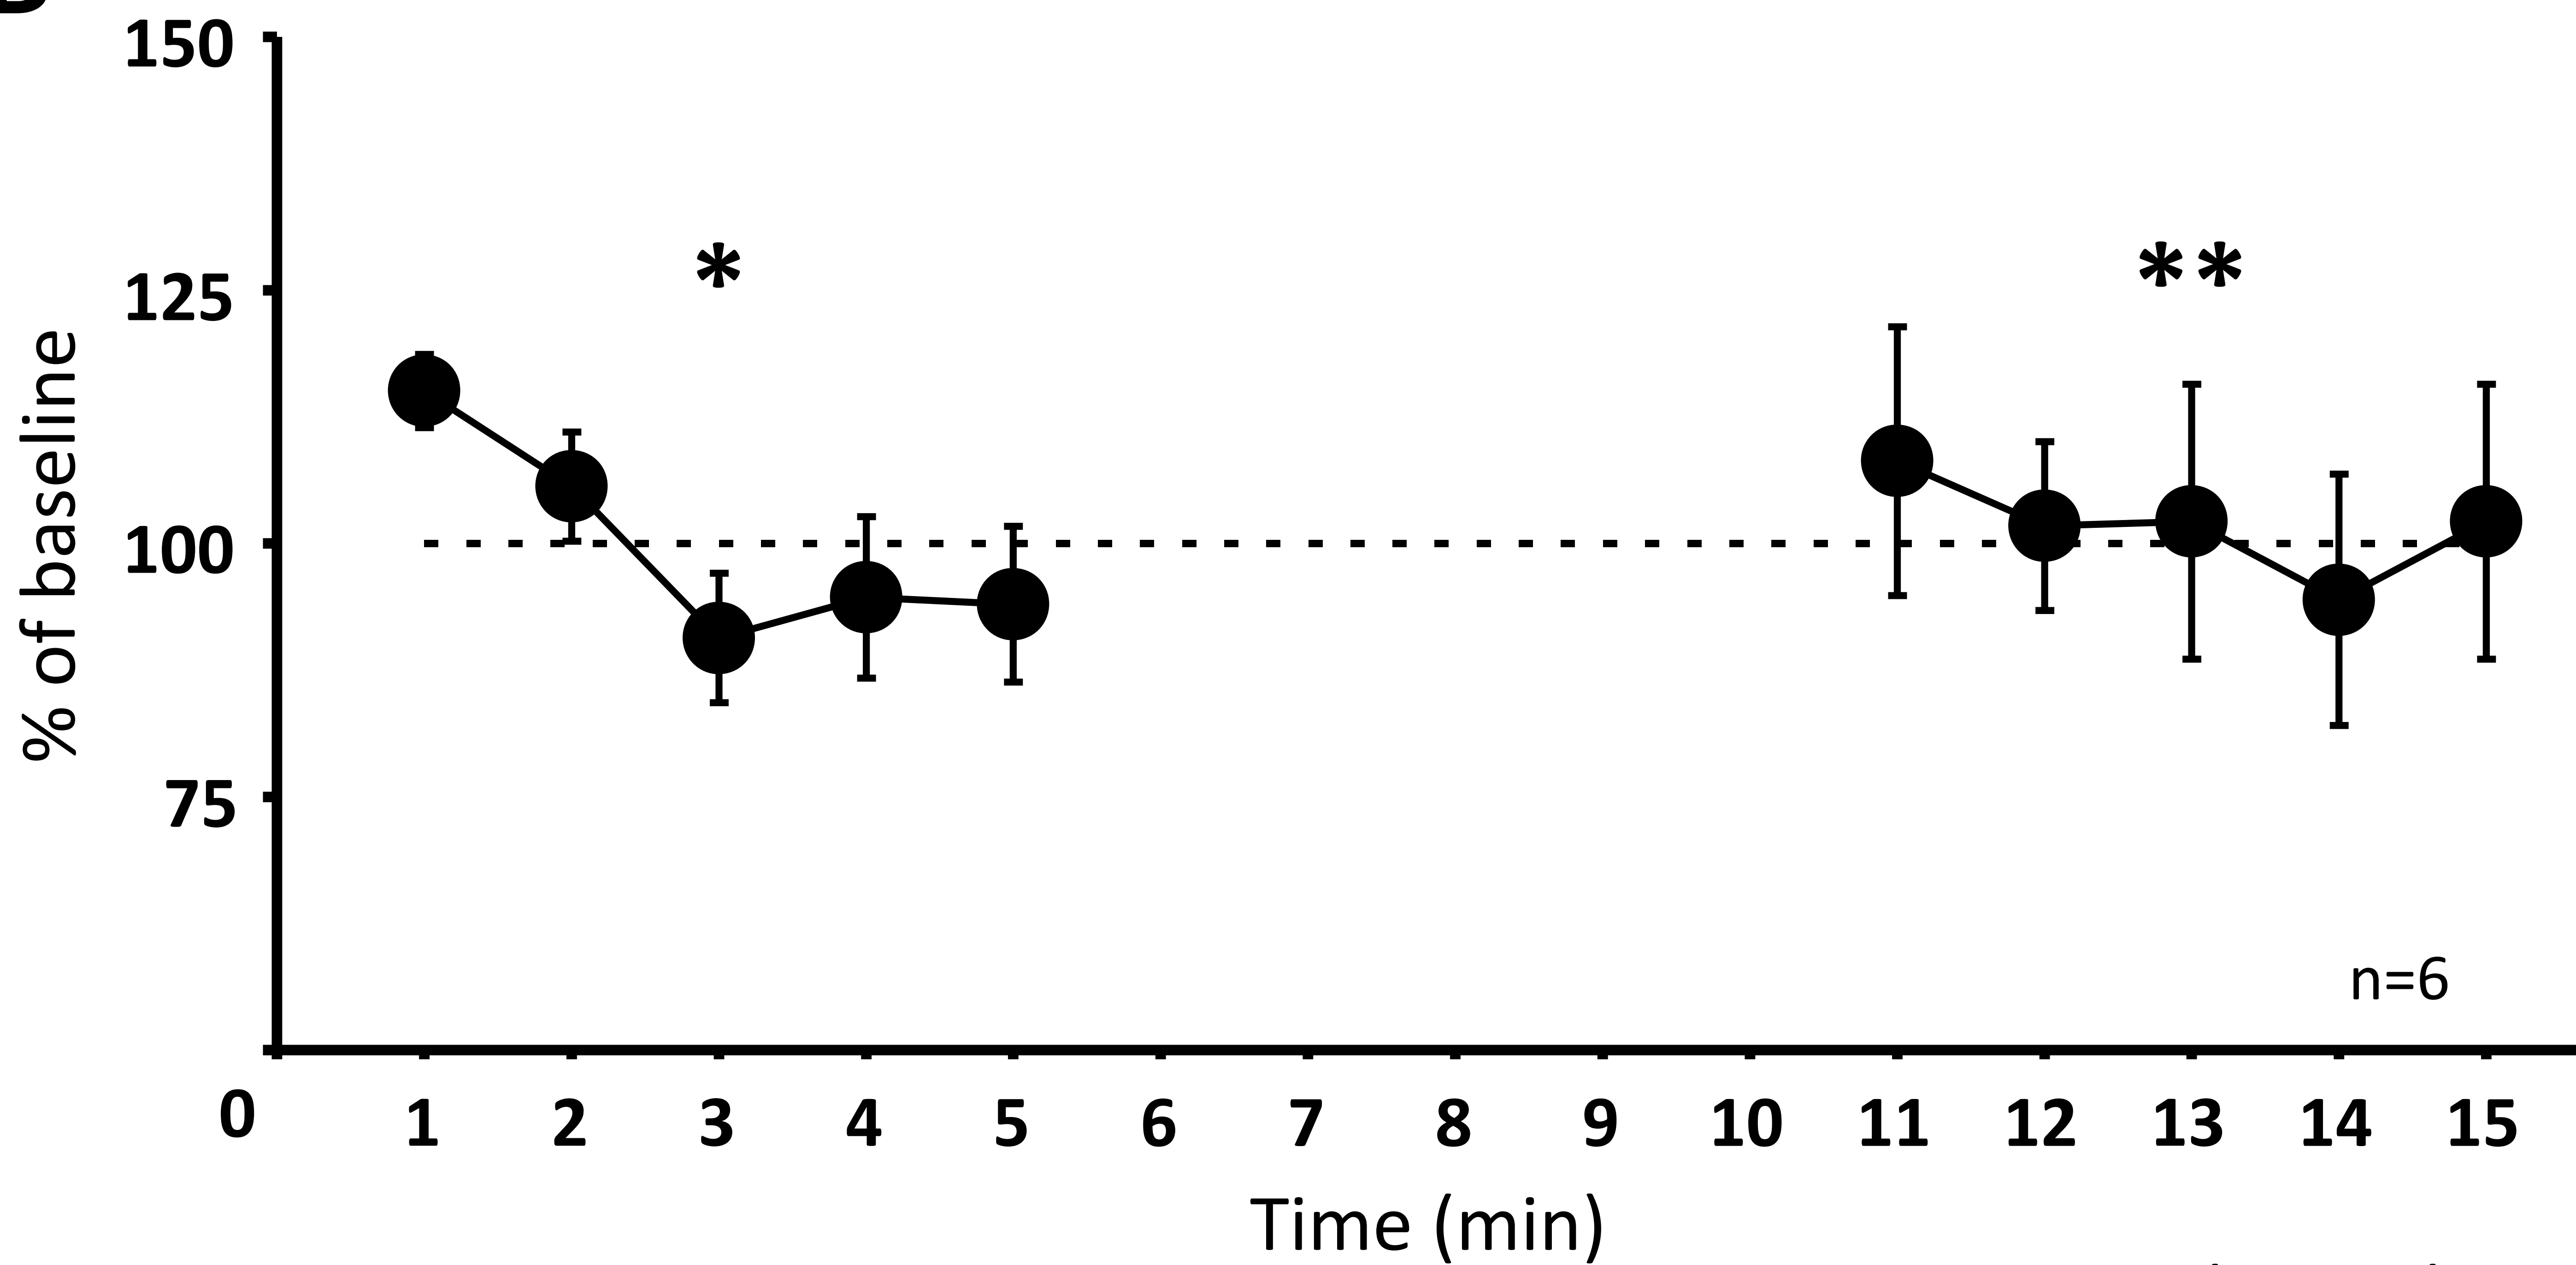

Supplement: supp_21.12.662_Supplemental_Figure_2.pdf [file supp_21.12.662_Supplemental_Figure_2.pdf]
